# Supplementary material for: Prevalence and Spatial Patterns of Major Limb Loss in the Acholi Sub-Region of Uganda
Source: MDPI journal article supplement (doi:10.3390/prosthesis4030030), 2022-07-19
Supplement: s1 [file s1]

Archive with 2 entries (2 files):
- File S1_household_head_questionnaire.pdf
- File S2_mll_questionnaire.pdf
