# Supplementary material for: Prevalence and Spatial Patterns of Major Limb Loss in the Acholi Sub-Region of Uganda
Source: MDPI journal article supplement (doi:10.3390/prosthesis4030030), 2022-07-19
Supplement: s1 [file s1 › File S1_household_head_questionnaire.pdf]

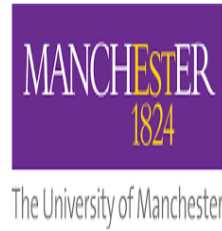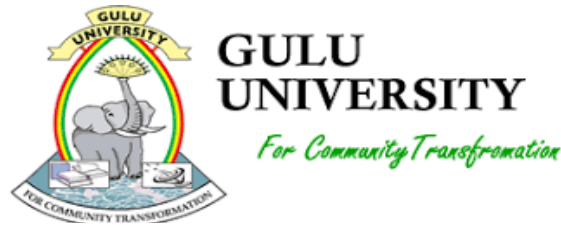

**Title: Mitigating the cultural, social and organizational barriers for meeting the needs of patients with major limb loss in post-conflict Northern Uganda.**

The purpose of this study is to carry out a Health Needs Assessment and design, develop and evaluate new service models to mitigate the needs of patients with major limb loss in the Acholi Sub-region.

**Semi-structured questionnaire for household head**

**Interviewer's Name:** ..... **Code:** .....

**Date of visit:** \_\_\_\_/\_\_\_\_/\_\_\_\_/dd/mm/yy **District:** \_\_\_\_\_

**County.** \_\_\_\_\_ **Sub-county** \_\_\_\_\_

**Parish** \_\_\_\_\_ **Village** \_\_\_\_\_

**Part 1: Socio-demographic characteristics of the head of household**

|                                                                                                                                                                                                                                                         |                                                                                                                                                                                                                                                |                                                                                                                                                                                                                                      |
|---------------------------------------------------------------------------------------------------------------------------------------------------------------------------------------------------------------------------------------------------------|------------------------------------------------------------------------------------------------------------------------------------------------------------------------------------------------------------------------------------------------|--------------------------------------------------------------------------------------------------------------------------------------------------------------------------------------------------------------------------------------|
| <p><b>1. Gender</b><br/>1. Male<br/>2. Female</p> <p><b>2. How old are you?</b> _____<br/>[completed years]</p> <p><b>3. Tribe of respondent</b><br/>1. Acholi<br/>2. Alur<br/>3. Langi<br/>4. Madi<br/>5. Lugbara<br/>6. Others<br/>(specify).....</p> | <p><b>4. Religion</b><br/>1. Catholic<br/>2. Protestant/Anglican<br/>3. Muslim<br/>4. Pentecostal<br/>5. Others<br/>(specify).....</p> <p><b>5. Educational level reached?</b><br/>1. None<br/>2. Primary<br/>3. Secondary<br/>4. Tertiary</p> | <p><b>6. Were you able to complete your studies?</b> 1. Yes 2. No</p> <p><b>7. If No in question 6, give reasons.....</b><br/>.....<br/>.....<br/>.....<br/>.....<br/>.....</p> <p><b>8. Residence</b><br/>1. Urban<br/>2. Rural</p> |
|---------------------------------------------------------------------------------------------------------------------------------------------------------------------------------------------------------------------------------------------------------|------------------------------------------------------------------------------------------------------------------------------------------------------------------------------------------------------------------------------------------------|--------------------------------------------------------------------------------------------------------------------------------------------------------------------------------------------------------------------------------------|

|                                                                                                                                                                                                                                                                                  |                                                                                                                                                                                                                                                    |                                                                                                                                                                                                                                                    |
|----------------------------------------------------------------------------------------------------------------------------------------------------------------------------------------------------------------------------------------------------------------------------------|----------------------------------------------------------------------------------------------------------------------------------------------------------------------------------------------------------------------------------------------------|----------------------------------------------------------------------------------------------------------------------------------------------------------------------------------------------------------------------------------------------------|
| <b>9. What is your marital status?</b> <ol style="list-style-type: none"> <li>1. Single</li> <li>2. Married</li> <li>3. Living together</li> <li>4. Separated/ divorced</li> <li>5. Widowed</li> </ol>                                                                           | <b>10. What is your occupation?</b> <ol style="list-style-type: none"> <li>1. None</li> <li>2. Peasant farmer</li> <li>3. Teacher</li> <li>4. Shoe repairer</li> <li>5. Radio repairer</li> <li>6. Others (specify).....</li> <li>.....</li> </ol> | <b>11. If not formally employed, give reasons</b><br>.....<br>.....<br>.....<br>.....<br>.....<br>.....<br>.....<br>.....                                                                                                                          |
| <b>12. Where do you mainly get drinking water from?</b> <ol style="list-style-type: none"> <li>1. Unprotected well/spring</li> <li>2. Protected well/spring</li> <li>3. Borehole</li> <li>4. Tap</li> <li>5. Others (specify).....</li> </ol>                                    | <b>13. How far is the source of main drinking water from your home?</b> <ol style="list-style-type: none"> <li>1. Within ½ km</li> <li>2. Within 1 km</li> <li>3. Others (specify)...</li> </ol>                                                   | <b>14. What do you normally use for cooking?</b> <ol style="list-style-type: none"> <li>1. Firewood</li> <li>2. Charcoal</li> <li>3. Electricity</li> <li>4. Gas</li> <li>5. Others (specify).....</li> </ol>                                      |
| <b>15. What type of toilet facility does this household have?</b> <ol style="list-style-type: none"> <li>1. No facility(bush)</li> <li>2. Traditional pit latrine</li> <li>3. Ventilated Pit latrine (VIP)</li> <li>4. Flush toilet</li> <li>5. Others (specify).....</li> </ol> | <b>16. Do you use the facility in 15 above?</b> <ol style="list-style-type: none"> <li>1. Yes                      2. No</li> </ol><br><b>If No in 16 go to Qn 23</b>                                                                              | <b>17. Does the toilet facility have provision for a person with disability? (observe if toilet have a ramp and rails inside for a disabled person)</b><br><br><ol style="list-style-type: none"> <li>1. Yes                      2. No</li> </ol> |
| <b>18. What anal cleansing material do you mostly use?</b> <ol style="list-style-type: none"> <li>1. Toilet paper</li> <li>2. Pieces of paper</li> <li>3. Leaves</li> <li>4. Stones</li> <li>5. Others (specify).....</li> </ol>                                                 | <b>19. Do you have a handwashing facility near the toilet facility?</b> <ol style="list-style-type: none"> <li>1. Yes                      2. No</li> </ol>                                                                                        | <b>20. If yes, is the facility being used?</b> <ol style="list-style-type: none"> <li>1. Yes                      2. No</li> </ol>                                                                                                                 |

|                                                                                                                                                                                                                                                                                                                         |                                                                                                                                                                                                        |                                                                                                                                                                                                                                                 |
|-------------------------------------------------------------------------------------------------------------------------------------------------------------------------------------------------------------------------------------------------------------------------------------------------------------------------|--------------------------------------------------------------------------------------------------------------------------------------------------------------------------------------------------------|-------------------------------------------------------------------------------------------------------------------------------------------------------------------------------------------------------------------------------------------------|
| <b>21. Is the handwashing facility functional? (observe functionality)</b><br><br>1. Yes      2. No                                                                                                                                                                                                                     | <b>22. Is there soap next to the handwashing facility? (observe presence of soap)</b><br><br>1. Yes      2. No                                                                                         |                                                                                                                                                                                                                                                 |
| <b>Observe the housing materials (questions 23 to 27):</b> The type of materials used for construction is a measure of the economic wellbeing of the households because it affects the health status of the household members.                                                                                          |                                                                                                                                                                                                        |                                                                                                                                                                                                                                                 |
| <b>23. Type of house</b><br>1. Temporary<br>2. Permanent<br><br><b>24. Roofing materials</b><br>1. <i>Permanent materials</i><br>1. Iron sheets    2. Tiles<br><br>3. concrete<br>2. <i>Temporary materials</i><br>1. Grass<br>2. Tins<br>3. Others (specify)                                                           | <b>25. Floor materials</b><br>1. Permanent materials<br>1. Concrete<br>2. Cement<br>3. Tiles<br><br>2. Temporary materials<br>1. Rammed earth<br>2. Wood<br>3. Others (specify).....<br>.....<br>..... | <b>26. Wall materials</b><br>1. <i>Permanent</i><br>1. Burnt bricks<br>2. Cement blocks<br>3. Concrete/stones<br>2. <i>Temporary</i><br>1. Mud/wattle & cement<br>2. Unburnt bricks<br>3. Unburnt bricks & mud<br>4. Wood<br>5. Tin/iron sheets |
| <b>27. Indicate which of the listed assets you own by ticking;</b><br><b>1. Non-movable assets</b><br>1. House<br>2. Land<br><br><b>2. Transport</b><br>1. Bicycle<br>2. Motor cycle<br>3. Motor vehicle<br>4. Others (specify)..<br><br><b>3. ICT equipment</b><br>1. Mobile phone<br>2. Radio<br>3. TV<br>4. Computer |                                                                                                                                                                                                        |                                                                                                                                                                                                                                                 |

|                                                                                                                                                                                                           |                                                                                                                                                                                                                                                                                                                |                                                                                                                                                                                   |
|-----------------------------------------------------------------------------------------------------------------------------------------------------------------------------------------------------------|----------------------------------------------------------------------------------------------------------------------------------------------------------------------------------------------------------------------------------------------------------------------------------------------------------------|-----------------------------------------------------------------------------------------------------------------------------------------------------------------------------------|
| <p><b>28. Do you have any person with disability in this household aged 6-60 years?</b></p> <p>1. Yes<br/>2. No</p> <p><b>If No in qn 28, go to 42</b></p>                                                | <p><b>29. If yes, who is disabled?</b></p> <p>1. Myself<br/>2. My child<br/>3. My wife<br/>4. Others<br/>(specify).....<br/>.....</p> <p><b>30. What type of disability does the person have?</b></p> <p>1. Vision<br/>2. Hearing<br/>3. Physical<br/>4. Mental<br/>5. Others<br/>(specify).....<br/>.....</p> | <p><b>31. What was the cause of the disability?</b></p> <p>1. Disease<br/>2. Birth defects<br/>3. Accident<br/>4. Domestic violence<br/>5. Others .....</p>                       |
| <p><b>32. If physical disability in 30, was there limb loss?</b></p> <p>1. Yes<br/>2. No</p> <p><b>If No in qn 32, go to qn 42</b></p>                                                                    | <p><b>33. If yes in 32, what type of limb loss was it?</b></p> <p>1. upper limb loss<br/>2. lower limb loss<br/>3. Both upper and lower limbs<br/>4. Others (specify).....</p>                                                                                                                                 | <p><b>34. Describe the level of the limb loss</b></p> <p>1. below wrist<br/>2. above wrist<br/>3. below ankle joint<br/>4. above ankle joint<br/>5. Others<br/>(specify).....</p> |
| <p><b>35. What was the cause of the limb loss?</b></p> <p>1. Boda boda accident<br/>2. Motor vehicle accident<br/>3. Gun shots<br/>4. Landmine<br/>5. Violence<br/>6. Bomb blasts<br/>7. Others .....</p> | <p><b>36. When did you (person) loose the limb(s)?</b></p> <p>1. &lt; 6 months ago<br/>2. 6 – 12 months ago<br/>2. &gt;12 months ago</p>                                                                                                                                                                       | <p><b>37. Did the person with limb loss receive any assistive devices?</b></p> <p>1. Yes<br/>2. No</p> <p><b>38. If No, why?.....</b><br/>.....<br/>.....<br/>.....<br/>.....</p> |

|                                                                                                                                                                               |                                                                                                                                                                                                                                                                                                                                 |                                                                                                                                                                                                            |
|-------------------------------------------------------------------------------------------------------------------------------------------------------------------------------|---------------------------------------------------------------------------------------------------------------------------------------------------------------------------------------------------------------------------------------------------------------------------------------------------------------------------------|------------------------------------------------------------------------------------------------------------------------------------------------------------------------------------------------------------|
| <b>39. If Yes, what device did he/she receive?</b><br>1. Prosthesis<br>2. Clutches<br>3. Wheel chair<br>4. Orthopaedic boots<br>5. Others<br>(specify).....<br>.....<br>..... | <b>40. Where did the person receive the above assistive device(s) from?</b><br>1. Health centre IV<br>2. Government hospital<br>3. Private hospital<br>4. Others (specify).....<br><br><b>41. How far from your home is the place where assistive device was received?</b><br>1. 1-5 km<br>2. 6- 10<br>3. 11-15 km<br>4. >15 km | <b>42. Do you know of anyone in this village with a limb loss?</b><br>1. Yes<br>2. No<br><br><b>If No, go to qn 45</b><br><br><b>43. If Yes, what is the gender of the person?</b><br>1. Male<br>2. Female |
| <b>44. Which village does the person lives in?</b><br>.....<br>.....                                                                                                          | <b>45. In your opinion, how far is your home to the nearest health facility?</b><br>1. 1-5 km<br>2. 6- 10<br>3. 11-15 km<br>4. >15 km                                                                                                                                                                                           | <b>46. How far is your home to Gulu Regional Referral hospital?</b><br>1. 1-5 km<br>2. 6- 10<br>3. 11-15 km<br>4. >15 km                                                                                   |
| <b>47. How in your opinion has the disability affected the livelihood of a person with disability (e.g employment, monthly income)?</b><br>.....<br>.....<br>.....<br>.....   |                                                                                                                                                                                                                                                                                                                                 |                                                                                                                                                                                                            |
| <b>48. How in your opinion has the disability affected the social integration of a person with disability (friends, marriages)?</b><br>.....<br>.....<br>.....<br>.....       |                                                                                                                                                                                                                                                                                                                                 |                                                                                                                                                                                                            |

Thank you for your time
